# Supplementary material
Source: publisher figshare collection journal article supplement (https://gsajournals.figshare.com/ndownloader/files/39530632)
Supplement: Supplementary file 1 [file 39530632]

## Sheet: Sheet1
Table S3: Sequencing statistics of the PTM x PTM F1 progeny.
Isolate	Sequencing Location	Number of Reads from Sequencer (first pair)	Number of Reads from Sequencer	Number of Reads (trimmed)	Number of reads mapped to PTM	Percent reads mapped PTM	Read Depth	Bases Covered	Percent Genome Covered	Read Length (bp)
FxS1	Novogene	240474	240474	235212	193062	80.2839	4.09031	12559344	32.7349	148.85
FxS2	Novogene	158926	158926	155537	124575	78.3855	3.55117	9721064	25.3371	146.708
FxS3	Novogene	142883	142883	139831	109312	76.5046	3.21173	9152189	23.8544	146.457
FxS4	Novogene	414588	414588	405117	304627	73.477	5.92057	13992299	36.4697	149.448
FxS5	Novogene	253152	253152	243656	197168	77.8852	4.57767	11295761	29.4414	133.025
FxS6	Novogene	141964	141964	138771	119750	84.3524	3.49255	9035172	23.5494	147.336
FxS7	Novogene	253862	253862	248177	192393	75.7865	4.61547	11112871	28.9648	149.111
FxS8	Novogene	113045	113045	110604	88406	78.2043	2.8716	8045627	20.9702	148.944
FxS9	Novogene	109132	109132	105955	86719	79.4625	2.94447	7669766	19.9906	137.721
FxS10	Novogene	136291	136291	133361	108586	79.6722	3.28893	8630261	22.494	148.071
FxS11	Novogene	143990	143990	140859	104189	72.3585	2.96661	9341692	24.3483	147.228
FxS12	Novogene	66779	66779	65184	51881	77.6906	2.07376	6968441	18.1626	143.803
FxS13	Novogene	221181	221181	216186	170927	77.2792	4.09026	11756110	30.6413	149.307
FxS14	Novogene	270929	270929	264781	215837	79.6655	5.77986	10196255	26.5757	148.922
FxS15	Novogene	195310	195310	185396	161509	82.6937	3.65281	9982300	26.018	123.282
FxS16	Novogene	134455	134455	131876	104667	77.8454	3.33198	8676153	22.6137	147.487
FxS17	Novogene	188004	188004	183958	145002	77.1271	3.96283	10208448	26.6075	146.758
FxS18	Novogene	197146	197146	193334	150783	76.4829	3.28946	11680837	30.4451	144.54
FxS19	Novogene	226666	226666	217932	180709	79.7248	3.51908	12108679	31.5602	129.41
FxS20	Novogene	57017	57017	55761	44709	78.4135	2.03772	6073888	15.8311	149.355
FxS21	Novogene	239930	239930	230344	203065	84.6351	4.14616	11559423	30.1287	129.979
FxS22	Novogene	253099	253099	247980	199260	78.7281	4.6033	11345195	29.5703	146.233
FxS24	Novogene	53558	53558	52034	39165	73.1263	1.75429	6050143	15.7692	137.533
FxS25	Novogene	232006	232006	220615	179915	77.5476	3.93779	10959670	28.5654	124.804
FxS26	Novogene	178040	178040	174498	133273	74.8557	3.37012	10278064	26.7889	146.496
FxS27	Novogene	107565	107565	105351	83994	78.0867	2.61611	8611408	22.4449	146.051
FxS28	Novogene	80178	80178	77608	65525	81.7244	2.17285	7685396	20.0313	137.118
FxS29	Novogene	219750	219750	210831	173093	78.7681	3.62427	11035335	28.7627	126.545
FxS31	Novogene	264180	264180	258323	175730	66.519	4.32154	13535576	35.2793	148.948
FxS32	Novogene	192447	192447	187314	153702	79.8672	4.11778	10168733	26.5039	146.091
FxS33	Novogene	211998	211998	207098	155420	73.312	3.25825	12300268	32.0596	147.139
FxS34	Novogene	113807	113807	111398	97618	85.775	2.88235	8852728	23.0739	144.672
FxS35	Novogene	98595	98595	95939	82357	83.5306	2.61512	8368141	21.8108	139.679
FxS36	Novogene	197544	197544	193583	144018	72.9043	3.11824	12185958	31.7617	147.4
FxS37	Novogene	136799	136799	130984	109034	79.7038	2.87297	9278013	24.1824	127.694
FxS39	Novogene	103360	103360	101373	76567	74.078	2.44123	8251816	21.5077	146.275
FxS40	Novogene	169156	169156	165714	130101	76.9118	3.32723	10818309	28.197	148.195
FxS41	Novogene	318358	318358	305121	266842	83.8182	4.88232	13196677	34.396	131.169
FxS42	Novogene	317501	317501	308817	245429	77.3002	4.45524	15005839	39.1114	147.507
FxS43	Novogene	142333	142333	138601	114143	80.1943	3.59992	8835349	23.0286	146.627
FxS44	Novogene	146921	146921	141489	121915	82.98	2.86695	10475427	27.3033	132.284
FxS45	Novogene	89137	89137	86216	73846	82.8455	2.31121	8210156	21.3991	143.563
FxS46	Novogene	175575	175575	170647	126752	72.1925	2.88659	11923991	31.0789	148.621
FxS47	Novogene	157695	157695	153349	120659	76.5142	3.20102	10556384	27.5143	150.226
FxS48	Novogene	128400	128400	124938	107085	83.3995	3.15469	9182880	23.9344	147.818
FxS49	Novogene	119526	119526	116336	89018	74.4758	2.44063	10053173	26.2027	149.419
FxS50	Novogene	200890	200890	195239	151906	75.6165	3.31314	12457077	32.4683	150.239
FxS51	Novogene	138595	138595	134810	107861	77.8246	2.55843	11071481	28.8569	149.149
FxS52	Novogene	218285	218285	209143	169906	77.8368	3.54304	11933324	31.1032	129.081
FxS53	Novogene	202497	202497	196880	168590	83.2556	3.79345	12465469	32.4902	150.924
FxS54	Novogene	399151	399151	387463	306518	76.7925	5.63399	15197093	39.6099	148.913
FxS55	Novogene	200734	200734	195090	151130	75.2887	4.10598	11115456	28.9715	149.013
FxS56	Novogene	164814	164814	160870	126337	76.6543	2.96542	11573459	30.1652	149.495
FxS57	Novogene	187046	187046	182035	138783	74.1973	3.13235	12570070	32.7628	149.308
FxS58	Novogene	231362	231362	224405	178562	77.1786	3.4412	13268796	34.584	140.137
FxS59	Novogene	235431	235431	225754	184189	78.2348	3.80963	11670101	30.4171	127.99
FxS60	Novogene	153239	153239	146805	124932	81.5275	3.14396	9620471	25.0749	126.129
FxS61	Novogene	103444	103444	100894	82994	80.2308	2.30391	10434712	27.1972	148.742
FxS62	Novogene	271055	271055	263778	207655	76.6099	4.05168	14014971	36.5288	148.234
FxS66	Novogene	220186	220186	214731	181664	82.5048	4.50481	10995734	28.6594	148.695
FxS67	Novogene	119734	119734	116762	76974	64.2875	2.52138	9863912	25.7094	148.866
FxS68	Novogene	107545	107545	104549	87245	81.1242	2.92582	8104850	21.1246	149.207
FxS69	Novogene	141724	141724	137957	108487	76.5481	3.07035	9607343	25.0407	142.829
FxS70	Novogene	189182	189182	183953	146068	77.2103	3.3548	12072107	31.4649	141.717
FxS71	Novogene	74875	74875	73278	57141	76.3152	1.92193	8577279	22.3559	151.053
FxS72	Novogene	186659	186659	180038	146626	78.5529	3.27411	11757951	30.6461	136.223
FxS74	Novogene	388266	388266	373891	310965	80.0907	5.04604	15531736	40.4821	135.578
FxS75	Novogene	84340	84340	81639	65508	77.6713	1.88186	8696417	22.6665	136.783
FxS76	Novogene	167407	167407	160011	131395	78.4884	2.8499	11181579	29.1438	58.3079
FxS77	Novogene	180865	180865	173758	141040	77.9808	3.2673	10765973	28.0606	129.366
FxS78	Novogene	80649	80649	78393	60061	74.4721	1.94707	8326154	21.7014	140.686
FxS80	Novogene	125416	125416	118680	100557	80.1788	2.66728	8751573	22.8102	122.8
FxS82	Novogene	130561	130561	125926	107216	82.1195	2.73446	10342406	26.9566	136.542
FxS83	Novogene	219301	219301	210582	177056	80.7365	3.61374	12378136	32.2626	134.873
FxS84	Novogene	159674	159674	154618	126533	79.2446	3.15568	11743813	30.6093	158.977
FxS85	Novogene	132958	132958	128657	103791	78.063	3.23996	9960555	25.9613	156.259
FxS86	Novogene	143096	143096	137661	113549	79.3516	2.80762	10774930	28.0839	146.703
FxS87	Novogene	64014	64014	61811	52582	82.1414	2.22054	6743872	17.5773	148.374
FxS88	Novogene	104109	104109	100689	81518	78.3006	2.48894	9363654	24.4056	156.518
FxS89	Novogene	112255	112255	108513	90991	81.0574	2.69961	9347287	24.3629	157.133
FxS90	Novogene	304312	304312	293478	246805	81.1026	5.69849	12423959	32.382	156.607
FxS91	Novogene	198917	198917	191521	153127	76.9803	3.64441	12212475	31.8308	153.285
FxS92	Novogene	184460	184460	177970	145260	78.7488	4.61572	9372182	24.4278	154.71
FxS93	Novogene	119737	119737	115628	91992	76.8284	2.76632	9867285	25.7182	157.309
FxS94	Novogene	147307	147307	142106	118268	80.2867	2.88049	11829375	30.8323	157.952
FxS95	Novogene	136701	136701	132464	105225	76.9746	3.33968	9537847	24.8596	157.524
FxS96	Novogene	118854	118854	114360	98030	82.4793	2.57393	10117266	26.3698	138.948
FxS97	Novogene	173623	173623	167570	130587	75.213	3.80006	10219716	26.6368	151.039
FxS98	Novogene	119331	119331	115055	97555	81.7516	2.57249	10808612	28.1717	151.044
FxS99	Novogene	303061	303061	289767	253867	83.7676	4.42932	13865284	36.1387	132.062
FxS100	Novogene	182050	182050	174359	154122	84.6592	3.25311	11641362	30.3422	132.997
FxS101	Novogene	209214	209214	200625	165364	79.0406	3.13114	13366271	34.838	136.803
FxS102	Novogene	100236	100236	96600	79921	79.7328	2.24945	10096811	26.3165	148.49
FxS103	Novogene	102244	102244	98783	80338	78.5748	2.75612	9234749	24.0696	161.201
FxS104	Novogene	96681	96681	93275	65780	68.0382	2.23399	8426189	21.9621	147.529
FxS105	Novogene	141301	141301	136535	110226	78.0079	3.58625	8999108	23.4554	156.283
FxS106	Novogene	148031	148031	142876	119792	80.9236	3.48338	10087444	26.2921	161.081
FxS107	Novogene	226003	226003	218402	182757	80.8649	4.45047	11460357	29.8704	156.652
FxS108	Novogene	145826	145826	141143	102668	70.4045	2.66934	10986411	28.6351	155.312
FxS109	Novogene	155550	155550	150413	128296	82.4789	3.6015	10431402	27.1886	158.095
FxS110	Novogene	214734	214734	207705	170710	79.4984	3.64531	13202468	34.4111	158.999
FxS111	Novogene	101153	101153	96772	74697	73.8456	2.96189	7922384	20.649	156.129
FxS112	Novogene	205129	205129	198011	160025	78.0119	3.7885	12049734	31.4066	159.749
FxS113	Novogene	135068	135068	130454	99983	74.0242	2.85202	10553730	27.5074	160.122
FxS114	Novogene	124994	124994	120711	100200	80.1638	3.35137	8864465	23.1045	160.164
FxS115	Novogene	108859	108859	105177	83992	77.1567	2.72346	9363933	24.4063	158.252
FxS116	Novogene	250497	250497	241994	196854	78.5854	4.3582	12761001	33.2605	159.355
FxS117	Novogene	113671	113671	109739	95468	83.9862	2.41572	10303138	26.8543	145.355
FxS118	Novogene	99885	99885	96529	74150	74.2354	2.73311	9201014	23.9817	161.08
